# Supplementary material for: Changes in water color shift competition between phytoplankton species with contrasting light‐harvesting strategies
Source: PubMed Central journal article supplement (PMC7079016; doi:10.1002/ecy.2951), 2020-02-03
Supplement: ECY-101-e02951-s001.pdf [file ECY-101-e02951-s001.pdf]

**Supporting Information.** Luimstra, V. M., J. M. H. Verspagen, T. Xu, J. M. Schuurmans, and J. Huisman. 2020. Changes in water color shift competition between phytoplankton species with contrasting light-harvesting strategies. *Ecology*.

## Appendix S1

### Section 1: Stability analysis

#### The model

We consider two species competing for two colors of light, blue ( $b$ ) and red ( $r$ ). In this case, the competition model of Eq. 6 can be written as:

$$\begin{aligned}\frac{dC_1}{dt} &= (f_{1b}(I_{out,b}) + f_{1r}(I_{out,r}) - m_1)C_1 \\ \frac{dC_2}{dt} &= (f_{2b}(I_{out,b}) + f_{2r}(I_{out,r}) - m_2)C_2\end{aligned}\tag{S1}$$

where the growth rates of species  $i$  on blue and red light are given by

$$\begin{aligned}f_{ib}(I_{out,b}) &= \phi_{ib}k_{ib} \left( \frac{I_{in,b} - I_{out,b}}{\ln(I_{in,b}) - \ln(I_{out,b})} \right) \\ f_{ir}(I_{out,r}) &= \phi_{ir}k_{ir} \left( \frac{I_{in,r} - I_{out,r}}{\ln(I_{in,r}) - \ln(I_{out,r})} \right)\end{aligned}\tag{S2}$$

and

#### Stability analysis

The local stability of the coexistence equilibrium is investigated by analyzing the Jacobian matrix of the system (e.g., Edelstein-Keshet 1988, Otto and Day 2007). The Jacobian matrix is given by

$$\mathbf{J} = \begin{pmatrix} A_{11} & A_{12} \\ A_{21} & A_{22} \end{pmatrix} = \begin{pmatrix} \frac{\partial(dC_1/dt)^*}{\partial C_1} & \frac{\partial(dC_1/dt)^*}{\partial C_2} \\ \frac{\partial(dC_2/dt)^*}{\partial C_1} & \frac{\partial(dC_2/dt)^*}{\partial C_2} \end{pmatrix}\tag{S3}$$

where the superscript \* indicates that the matrix is to be evaluated at the coexistence equilibrium. The coexistence equilibrium is stable if and only if:

$$\text{trace}(\mathbf{J}) = A_{11} + A_{22} < 0\tag{S4}$$

$$\det(\mathbf{J}) = A_{11}A_{22} - A_{12}A_{21} > 0$$

We note that, at the coexistence equilibrium,  $f_{ib}(I_{out,b}) + f_{ir}(I_{out,r}) - m_i = 0$  for both species. Hence, the elements of the Jacobian matrix can be written as

$$A_{ij} = \frac{\partial f_{ib}}{\partial I_{out,b}} \frac{\partial I_{out,b}}{\partial C_j} + \frac{\partial f_{ir}}{\partial I_{out,r}} \frac{\partial I_{out,r}}{\partial C_j} \quad (\text{S5})$$

It is straightforward to derive that both  $\partial f_{ib}/\partial I_{out,b} > 0$  and  $\partial f_{ir}/\partial I_{out,r} > 0$ , whereas both  $\partial I_{out,b}/\partial C_j < 0$  and  $\partial I_{out,r}/\partial C_j < 0$ . It follows that all  $A_{ij} < 0$  and therefore  $\text{trace}(\mathbf{J}) < 0$ .

After some algebra, the determinant of the Jacobian matrix can be written as

$$\det(\mathbf{J}) = \left( \frac{\partial f_{1b}}{\partial I_{out,b}} \frac{\partial f_{2r}}{\partial I_{out,r}} - \frac{\partial f_{2b}}{\partial I_{out,b}} \frac{\partial f_{1r}}{\partial I_{out,r}} \right) \left( \frac{\partial I_{out,b}}{\partial C_1} \frac{\partial I_{out,r}}{\partial C_2} - \frac{\partial I_{out,b}}{\partial C_2} \frac{\partial I_{out,r}}{\partial C_1} \right) \quad (\text{S6})$$

From Lambert-Beer's law, we note that

$$\frac{\partial I_{out,b}}{\partial C_i} = -k_{ib}I_{out,b} \quad \text{and} \quad \frac{\partial I_{out,r}}{\partial C_i} = -k_{ir}I_{out,r} \quad (\text{S7})$$

Furthermore,

$$\frac{\partial f_{ib}}{\partial I_{out,b}} = \phi_{ib}k_{ib} \frac{\partial I_{avg,b}}{\partial I_{out,b}} \quad \text{and} \quad \frac{\partial f_{ir}}{\partial I_{out,r}} = \phi_{ir}k_{ir} \frac{\partial I_{avg,r}}{\partial I_{out,r}} \quad (\text{S8})$$

Hence, we obtain

$$\det(\mathbf{J}) = (\phi_{1b}\phi_{2r}k_{1b}k_{2r} - \phi_{2b}\phi_{1r}k_{2b}k_{1r}) (k_{1b}k_{2r} - k_{2b}k_{1r}) \frac{\partial I_{avg,b}}{\partial I_{out,b}} \frac{\partial I_{avg,r}}{\partial I_{out,r}} I_{out,b}I_{out,r} \quad (\text{S9})$$

Since  $\partial I_{avg,b}/\partial I_{out,b} > 0$  and  $\partial I_{avg,r}/\partial I_{out,r} > 0$ , the signs of the two bracketed terms in this equation determine whether the coexistence equilibrium is stable or unstable.

#### *Case 1: Photosynthetic efficiency independent of light color*

Suppose that photosynthetic efficiency is independent of light color, i.e., a species utilizes all its absorbed photons with the same efficiency irrespective of wavelength, as assumed by Stomp et al. (2004, 2007). Hence,  $\phi_{1b} = \phi_{1r} = \phi_1$  and  $\phi_{2b} = \phi_{2r} = \phi_2$ , and the determinant simplifies to

$$\det(\mathbf{J}) = \phi_1\phi_2(k_{1b}k_{2r} - k_{2b}k_{1r})^2 \frac{\partial I_{avg,1}}{\partial I_{out,1}} \frac{\partial I_{avg,2}}{\partial I_{out,2}} I_{out,1}I_{out,2} \quad (\text{S10})$$

In this case, it follows that  $\det(\mathbf{J}) > 0$  and therefore the coexistence equilibrium is locally stable whenever it exists.

*Case 2: Photosynthetic efficiency depends on light color*

More generally, photosynthetic efficiency varies with light color. Let us arbitrarily assume that species 1 is a better competitor for blue light and species 2 a better competitor for red light. Graphically, this implies that species 1 has a steeper zero isocline than species 2 (as in Fig. 2B, where the green alga would be species 1 and the cyanobacterium species 2). According to Eqs. 8a,b, this difference in slope of the zero isoclines implies

$$\frac{\phi_{1b}k_{1b}}{\phi_{1r}k_{1r}} > \frac{\phi_{2b}k_{2b}}{\phi_{2r}k_{2r}} \quad (\text{S11})$$

Hence, the first bracketed term in Eq. S9 is positive, and therefore the sign of  $\det(\mathbf{J})$  depends only on the second bracketed term. This implies that  $\det(\mathbf{J}) > 0$  and, hence, the coexistence equilibrium is locally stable if

$$\frac{k_{2r}}{k_{2b}} > \frac{k_{1r}}{k_{1b}} \quad (\text{S12})$$

whereas it is locally unstable if this inequality is reversed. In other words, if species 2 (the better competitor for red light) absorbs relatively more red than blue light in comparison to species 1, then coexistence of the two species is stable. Conversely, if species 2 absorbs relatively more blue than red light in comparison to species 1, then the coexistence equilibrium is unstable and the winner will depend on the initial abundances of the species.

**Literature Cited**

- Edelstein-Keshet, L. 1988. *Mathematical models in biology*. Random House, New York.
- Otto, S. P., and T. Day. 2007. *A biologist's guide to mathematical modeling in ecology and evolution*. Princeton University Press, NJ, USA.
- Stomp, M., J. Huisman, F. De Jongh, A. J. Veraart, D. Gerla, M. Rijkeboer, B. W. Ibelings, U. I. A. Wollenzien, and L. J. Stal. 2004. Adaptive divergence in pigment composition promotes phytoplankton biodiversity. *Nature* 432:104-107.
- Stomp, M., J. Huisman, L. Vörös, F. R. Pick, M. Laamanen, T. Haverkamp, and L. J. Stal. 2007. Colourful coexistence of red and green picocyanobacteria in lakes and seas. *Ecology Letters* 10:290-298.

**Table S1.** Model parameters estimated from the monoculture experiments

| Symbol                                 | Definition                                           | Value                  | Units                                        |                                  |
|----------------------------------------|------------------------------------------------------|------------------------|----------------------------------------------|----------------------------------|
| <b>Variables:</b>                      |                                                      |                        |                                              |                                  |
| $C_i$                                  | Biomass of phytoplankton species $i$                 | -                      | $\text{mm}^3 \text{L}^{-1}$                  |                                  |
| $I_{out,blue}$                         | Blue light transmitted through the chemostats        | -                      | $\mu\text{mol photons m}^{-2} \text{s}^{-1}$ |                                  |
| $I_{out,red}$                          | Red light transmitted through the chemostats         | -                      | $\mu\text{mol photons m}^{-2} \text{s}^{-1}$ |                                  |
| <b>System parameters:</b>              |                                                      |                        |                                              |                                  |
| $I_{in,j}$                             | Incident blue or red light intensity                 | 45                     | $\mu\text{mol photons m}^{-2} \text{s}^{-1}$ |                                  |
| $K_{bg,blue}$                          | Background turbidity of blue light                   | 7.5                    | $\text{m}^{-1}$                              |                                  |
| $K_{bg,red}$                           | Background turbidity of red light                    | 9                      | $\text{m}^{-1}$                              |                                  |
| $K_{bg,green}$                         | Background turbidity of green light                  | 8                      | $\text{m}^{-1}$                              |                                  |
| $z_{max}$                              | Maximum depth of water column                        | 0.05                   | m                                            |                                  |
| $D$                                    | Dilution rate*                                       | 0.015                  | $\text{h}^{-1}$                              |                                  |
| <b>Species parameters<sup>1</sup>:</b> |                                                      |                        |                                              |                                  |
|                                        |                                                      | <i>Chlorella</i>       | <i>Synechocystis</i>                         |                                  |
| $\phi_{i,blue}$                        | Photosynthetic efficiency in blue light              | $2.30 \times 10^{-3}$  | $0.69 \times 10^{-3}$                        | $\text{mm}^3 \mu\text{mol}^{-1}$ |
| $\phi_{i,red}$                         | Photosynthetic efficiency in red light               | $3.00 \times 10^{-3}$  | $3.80 \times 10^{-3}$                        | $\text{mm}^3 \mu\text{mol}^{-1}$ |
| $k_{i,blue}$                           | Specific light absorption coefficient in blue light  | $2.60 \times 10^{-4}$  | $2.10 \times 10^{-4}$                        | $\text{m}^2 \text{mm}^{-3}$      |
| $k_{i,red}$                            | Specific light absorption coefficient in red light   | $1.33 \times 10^{-4}$  | $1.16 \times 10^{-4}$                        | $\text{m}^2 \text{mm}^{-3}$      |
|                                        |                                                      | <i>Prochlorococcus</i> | <i>Synechococcus</i>                         |                                  |
| $\phi_{i,blue}$                        | Photosynthetic efficiency in blue light              | $2.30 \times 10^{-3}$  | $0.69 \times 10^{-3}$                        | $\text{mm}^3 \mu\text{mol}^{-1}$ |
| $\phi_{i,green}$                       | Photosynthetic efficiency in green light             | $3.30 \times 10^{-3}$  | $3.80 \times 10^{-3}$                        | $\text{mm}^3 \mu\text{mol}^{-1}$ |
| $k_{i,blue}$                           | Specific light absorption coefficient in blue light  | $2.60 \times 10^{-4}$  | $2.10 \times 10^{-4}$                        | $\text{m}^2 \text{mm}^{-3}$      |
| $k_{i,green}$                          | Specific light absorption coefficient in green light | $5.20 \times 10^{-5}$  | $2.02 \times 10^{-4}$                        | $\text{m}^2 \text{mm}^{-3}$      |

\*We assume that specific loss rates of the species are dominated by the dilution rate of the chemostat (i.e.,  $m_i=D$ )

**Table S2.** Steady-state characteristics of monoculture experiments with the cyanobacterium *Synechocystis* and green alga *Chlorella* in blue and red light.

|                                                                                            | <i>Synechocystis</i> |              | <i>Chlorella</i> |            |
|--------------------------------------------------------------------------------------------|----------------------|--------------|------------------|------------|
|                                                                                            | blue light           | red light    | blue light       | red light  |
| Population density<br>(million cells mL <sup>-1</sup> )                                    | 7.5 ± 0.6            | 123.4 ± 12.6 | 25.4 ± 1.9       | 31.5 ± 5.5 |
| Total biovolume<br>(mm <sup>3</sup> L <sup>-1</sup> )                                      | 57 ± 4               | 696 ± 66     | 427 ± 39         | 640 ± 118  |
| Cell volume<br>(fL cell <sup>-1</sup> )                                                    | 7.7 ± 0.3            | 5.6 ± 0.2    | 16.8 ± 0.7       | 19.2 ± 1.9 |
| Light transmission $I_{out}$<br>(μmol photons m <sup>-2</sup> s <sup>-1</sup> )            | 19.3 ± 0.5           | < 0.5        | < 0.5            | < 0.5      |
| Critical light intensity $I_{avg,ij}^*$<br>(μmol photons m <sup>-2</sup> s <sup>-1</sup> ) | 28.8                 | 9.5          | 7.0              | 10.4       |

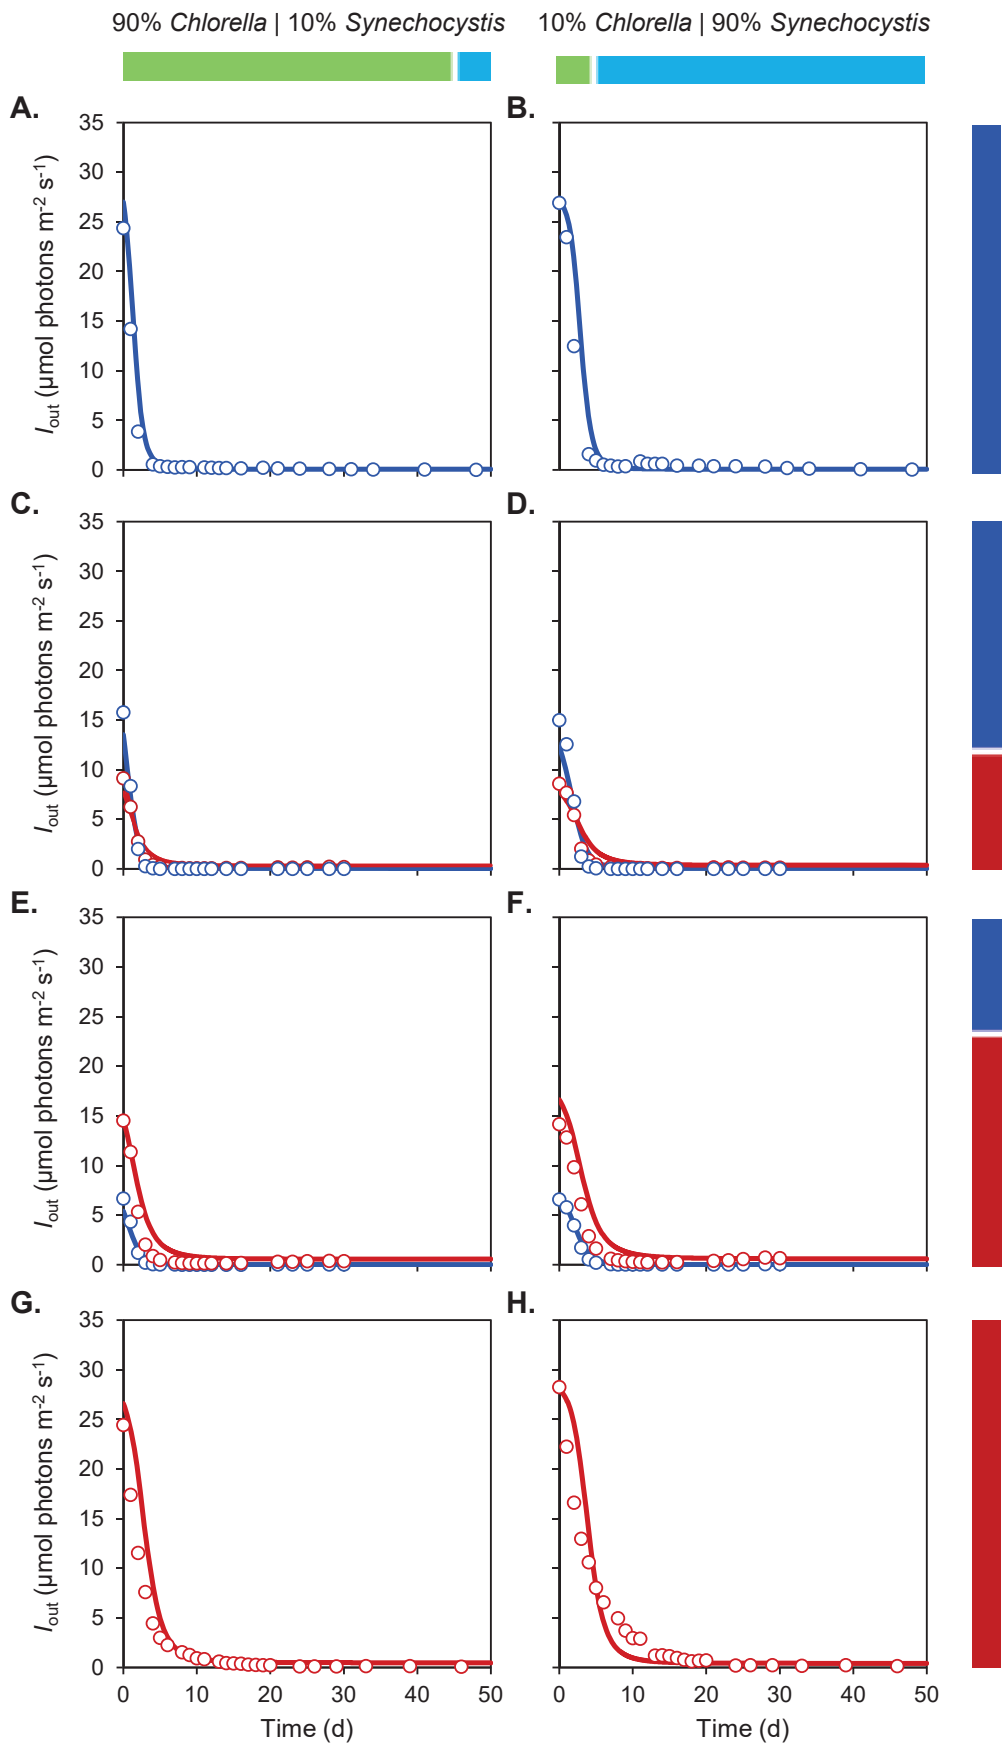

**Figure S1.** Light transmission ( $I_{out}$ ) through the competition experiments between the cyanobacterium *Synechocystis* and the green alga *Chlorella*. Blue circles represent blue light, red circles represent red light, and solid lines represent the model predictions. The graph has the same layout as Figure 4 in the main text.
